# Supplementary material for: Genome-wide discovery of structured noncoding RNAs in bacteria
Source: BMC Microbiol. 2019 Mar 22;19:66. doi: 10.1186/s12866-019-1433-7 (PMC6429828; doi:10.1186/s12866-019-1433-7)
Supplement: Supplementary file 1 — Table S1. Additional details regarding each motif and the summary of findings from all five genomes are presented in this table. (XLSX 44 kb) [file 12866_2019_1433_MOESM1_ESM.xlsx]

## Sheet: a | A. HIMB5
Accession	Motif name	Predicted function	Taxonomy	Unique examples	Prominent upstream genes or metabolic pathway; (direction)*	Prominent downstream genes/metabolic pathway; (direction)
NC_018643.1/1284726-1284603	TIGR03647 RNA	Strong riboswitch candidate	Alpha-proteobacteria (SAR11 group)	770	Esterase (<)	Solute:sodium symporter (>)
NC_018643.1/1333002-1333126	fcbT1-I RNA	Weak riboswitch candidate	Alpha-proteobacteria (SAR11 group)	28	NikM - Nickel uptake family protein (>)	FcbT1 - C4-dicarboxylate ABC transporter substrate-binding protein (>)
NC_018643.1/475457-475605	fcbT1-II RNA	Weak riboswitch candidate	Alpha-proteobacteria (SAR11 group)	19	BetA - Choline dehydrogenase and related flavoproteins (<)	FcbT1 - C4-dicarboxylate ABC transporter substrate-binding protein (>)
NC_018643.1/209885-210098	HRC-1	Potential cis-regulatory RNA	Alpha-proteobacteria (SAR11 group)	956	PrpE - Propionyl-CoA synthetase (<), DUF3448 - Unknown function (<)	Bacteriorhodopsin-like protein (>)
NC_018643.1/872554-872669	HRC-2	Cis-regulatory RNA	Alpha-proteobacteria (SAR11 group)	639	Unknown function (>)	AmtB - Ammonia channel protein (>)
NC_018643.1/439303-439422	PBC-1	Protein binding candidate	Alpha-proteobacteria (SAR11 group)	1418 (686 I, 704 II, 28 III)	Ammonium transporter (>)	Peroxiredoxin (<), ammonium transporter (>)
NC_018643.1/553311-553474	PBC-2	Transcription factor binding site	Alpha-proteobacteria (SAR11 group)	1200	Arginine ABC transporter ATP-binding protein	HipB - transcriptional regulator that neutralizes the toxic effect of cognate toxin HipA (>)
NC_018643.1/1311103-1311283	PBC-3	Protein binder, cytochrome c biogenesis	Alpha-proteobacteria (SAR11 group)	1111	YccV - Hemimethylated DNA-binding protein (>)	Cytochrome C biogenesis (>)
NC_018643.1/1325672-1325533	PBC-4	Transcription factor binding site	Alpha-proteobacteria (SAR11 group)	308	AdhP -D-arabinose 1-dehydrogenase (<)	AcoR - transcriptional activator of acetoin/glycerol metabolism (>)
NC_018643.1/1095045-1094825	PBC-5	DNase Binding Motif	Alpha-proteobacteria (SAR11 group)	98	Self-cleaving ribozyme associated protein 130 (>)	RmuC - DNA anti-recombination protein (>), Exodeoxyribonuclease I (>)
NC_018643.1/1096977-1096812	RS05825 RNA	Strong riboswitch candidate	Alpha-proteobacteria (SAR11 group)	80	Unknown function (> and <)	Unknown function (>)
NC_018643.1/94002-93878	SAR11-groES RNA	Likely cis-regulatory, RNA thermometer for GroES heat shock gene	Alpha-proteobacteria (SAR11 group)	722	HAD-superfamily class IIA hydrolase (<)	GroES - Heat shock co-chaperonine (>)
NC_018643.1/91899-91628	sORF-1	Short open reading frame	Alpha-proteobacteria (SAR11 group)	1080	Unkown function (<), unkown function (>), GroEL - chaperonin (>), FabI - Enoyl-[acyl-carrier-protein] reductase (>)	GTP-binding protein TypA/BipA (>), SrmB - ATP-dependent RNA helicase (<)
NC_018643.1/794806-795152	sORF-2	Short open reading frame/short RNA motif	Alpha-proteobacteria (SAR11 group)	802	3-hydroxyisobutyrate dehydrogenase (>), small multidrug resistance protein (>)	Unknown function (<), DUF952 (<), Cytochrome C (<)
NC_018643.1/1188339-1188005	sORF-3	Short open reading frame followed by terminator stem	Alpha-proteobacteria (SAR11 group)	398	Long-chain acyl-CoA synthetases (AMP-forming) (>), Unknown function (<)	CdnL - RNA polymerase-interacting regulator (<), Unknown function (<)
NC_018643.1/401637-401488	sRNA-1	Short RNA	Alpha-proteobacteria (SAR11 group)	1038	Phosphoglucomutase (>), sulfate permease and related transporters (<), tRNA (>)	Diadenosine tetraphosphate (Ap4A) hydrolase (<), sulfite exporter TauE/SafE (<)
NC_018643.1/367855-368062	Unnamed	Promoters for divergent genes	Alpha-proteobacteria (SAR11 group)	235	Taurine ABC transporter substrate-binding protein (<)	GabT - 4-aminobutyrate aminotransferase or related aminotransferase (>)
NC_018643.1/1099099-1099260	Unnamed	?	Alpha-proteobacteria (SAR11 group)	2	Helicase/type III restriction enzyme (>)	Unknown function (>)
NC_018643.1/798286-798121	Unnamed	?	Alpha-proteobacteria (SAR11 group)	2	Cytochrome c (>)	GcvT|DadA - Glycine cleavage system T protein| Glycine/D-amino acid oxidase (>)
NC_018643.1/437863_438000	uORF-1	Ammonium attenuator candidate	Alpha-proteobacteria (SAR11 group)	1064	Histone-like DNA-binding protein [transcriptional regulator] (>)	Ammonium transporter (>)
NC_018643.1/1114613-1114279	uORF-10	Cis-regulatory sORF	Alpha-proteobacteria (SAR11 group)	20	Unknown function (>)	Unknown function (>)
NC_018643.1/326050-326185	uORF-11	Cis-regulatory sORF	Alpha-proteobacteria (SAR11 group)	8	CoxG - carbon monoxide dehydrogenase subunit G (>)	CoxS - carbon monoxide dehydrogenase (>)
NC_018643.1/481414-481205	uORF-2	Cis-regulatory sORF	Alpha-proteobacteria (SAR11 group)	893	3-oxoacyl-(acyl-carrier-protein) reductase (>), NAD(P)-dependent sugar dehydrogenase (>)	DUF3047 - Unknown function (>)
NC_018643.1/831932-832080	uORF-3	Cis-regulatory sORF	Alpha-proteobacteria (SAR11 group)	844	GcvT - glycine cleavage system protein T (>)	Unknown function (>)
NC_018643.1/54778-54628	uORF-4	Terminator stem, potential sORF upstream	Alpha-proteobacteria (SAR11 group)	274	Two-component DNA-binding response regulator, ActR/RegA family (<)	Ornithine decarboxylase (>)
NC_018643.1/446013-445846	uORF-5	Cis-regulatory sORF	Alpha-proteobacteria (SAR11 group)	118	MnmA - tRNA(5-methylaminomethyl-2-thiouridylate)-methyltransferase (>), function unkown (>)	Cystathionine beta-lyases/cystathionine gamma-synthases (>)
NC_018643.1/1115697-1115277	uORF-6	Cis-regulatory sORF	Alpha-proteobacteria (SAR11 group)	87	Unknown function (>)	PqqL - Zn-dependent peptidase (>)
NC_018643.1/1208474-1208319	uORF-7	Cis-regulatory sORF	Alpha-proteobacteria (SAR11 group)	81	Rubrerythrin, nonheme iron binding domain (>)	GlpC (>) , CitB (>), other genes containng Fe-S oxidoreductase (>)
NC_018643.1/827779-827534	uORF-8	Cis-regulatory sORF	Alpha-proteobacteria (SAR11 group)	55	DUF2872 - Unknown function (>)	PhyH - Phytanoyl-CoA dioxygenase (>)
NC_018643.1/1118950-1118831	uORF-9	Cis-regulatory sORF	Alpha-proteobacteria (SAR11 group)	26	Unknown function (>)	Unknown function (>)
* (>) = same orientation as candidate motif, (<) = opposite orientation as candidate motif

## Sheet: b | C. novyi
Accession	Motif name	Predicted function	Taxonomy	Unique examples	Prominent upstream genes or metabolic pathway; (direction)	Prominent downstream genes/metabolic pathway; (direction)
NC_008593.1/235167-235576	RPL-1	Already known ribosomal protein leader for S10 operon, but not in this genome. No overlap with Rfam sequences	Firmicutes (all classes), Proteobacteria (Alpha, Beta, Gamma, Delta), Haloplasmatales, Tenericutes, Thermotogae, enviornmental sequences	4546	Varies	rpsJ gene for 30S ribosomal protein S10 (>)
NC_008593.1/1557114-1557599	uORF-12	Aromatic amino acid attenuator	Firmicutes; Bacilli, Clostridia, Erysipelotrichia, environmental sequences	1258	Diguanylate cyclase (<)	Sodium-dependent tryptophan transporter (>), other amino acid transporters, shikimate pathway genes
NC_008593.1/2016137-2016438	RAT-1	Ribonucleic Antiterminator (RAT) candidate	Firmicutes; Bacilli, Clostridia, Erysipelotrichia, Negativicutes, Tissierellia, Synergistetes, environmental sequences	766	Transcriptional antiterminator BglG (>)	Phosphoenolpyruvate-dependent sugar phosphotransferase system subunit IIABC (>)
NC_008593.1/595477-595738	thiS riboswitch candidate	thiS riboswitch candidate, "ON" switch for HMP-PP	Actino Bifidobacteriales, Coriobacteriia, Firmicutes; Bacilli; Bacillales, Lactobacillales, Firmicutes; Clostridia; Clostridiales, Firmicutes; Negativicutes; Selenomonadales, Firmicutes; Tissierellia; Tissierellales, environmental sequences	713	Hypothetical protein (>), TPP riboswitch (>)	(thiS operon) thiazole synthase (>)
NC_008593.1/2309418-2308872	uORF-13	Aromatic amino acid attenuator	Firmicutes; Bacilli; Bacillales, Clostridia; Clostridiales, Thermoanaerobacterales, Negativicutes; Acidaminococcales, Selenomonadales, Veillonellales, environmental sequences	336	Unknown function (<)	3-deoxy-7-phosphoheptulonate synthase (>), other shikimate pathway genes
NC_008593.1/592426-592744	PBC-6	Transcription factor binding site candidate, similar to AraC binding site in E. coli	Firmicutes; Bacilli; Bacillales; Bacillaceae; Bacillus; Bacillus cereus group, Firmicutes; Clostridia; Clostridiales; environmental sequences	244	Varies	AraC (>), many others
NC_008593.1/2398756-2399030	Repeat sequence-1	Transposase associated repeat sequence, 29 in this genome. Contains short ORF as well	Firmicutes; Clostridia; Clostridiales; Clostridiaceae; Clostridium; C. novyi, C. botulinum, C. carboxidivorans, C. homopropionicum, C. sporogenes, C. tyrobutyricum, environmental sequences	180	Transposase (<)	Varies
NC_008593.1/320290-320757	Repeat sequence-2	Transposase associated repeat sequence, 29 in this genome. Contains short ORF as well	Firmicutes; Clostridia; Clostridiales; Clostridiaceae; Clostridium; C. novyi, C. botulinum, C. carboxidivorans, C. homopropionicum, C. sporogenes, C. tyrobutyricum, environmental sequences	180	Transposase (<)	Varies
NC_008593.1/1533668-1533374	Repeat sequence-2	Transposase associated repeat sequence, 29 in this genome. Contains short ORF as well	Firmicutes; Clostridia; Clostridiales; Clostridiaceae; Clostridium; C. novyi, C. botulinum, C. carboxidivorans, C. homopropionicum, C. sporogenes, C. tyrobutyricum, environmental sequences	180	Transposase (<)	Varies
NC_008593.1/1944966-1945207	Repeat sequence-2	Transposase associated Repeat sequence, 29 in this genome. Contains short ORF as well	Firmicutes; Clostridia; Clostridiales; Clostridiaceae; Clostridium; C. novyi, C. botulinum, C. carboxidivorans, C. homopropionicum, C. sporogenes, C. tyrobutyricum, environmental sequences	180	Transposase (<)	Varies
NC_008593.1/2089505-2089944	Repeat sequence-3	Transposase associated repeat sequence, 29 in this genome. Contains short ORF as well	Firmicutes; Clostridia; Clostridiales; Clostridiaceae; Clostridium; C. novyi, C. botulinum, C. carboxidivorans, C. homopropionicum, C. sporogenes, C. tyrobutyricum, environmental sequences	180	Transposase (<)	Varies
NC_008593.1/875287-875581	Repeat sequence-3	Transposase associated repeat sequence, 29 in this genome. Contains short ORF as well	Firmicutes; Clostridia; Clostridiales; Clostridiaceae; Clostridium; C. novyi, C. botulinum, C. carboxidivorans, C. homopropionicum, C. sporogenes, C. tyrobutyricum, environmental sequences	180	Transposase (<)	Varies
NC_008593.1/318709-318969	Repeat sequence-3	Transposase associated repeat sequence, 29 in this genome. Contains short ORF as well. Note, this repeat sequence is downstream of the same transposase that is downstream of repeat sequence candidate 1 (RSC-1)	Firmicutes; Clostridia; Clostridiales; Clostridiaceae; Clostridium; C. novyi, C. botulinum, C. carboxidivorans, C. homopropionicum, C. sporogenes, C. tetani, environmental sequences	180	Transposase (>)	Varies
NC_008593.1/627906-628244	Repeat sequence-4	Transposase associated repeat sequence, 29 in this genome. Contains short ORF as well	Firmicutes; Clostridia; Clostridiales; Clostridiaceae; Clostridium; C. novyi, C. botulinum, C. carboxidivorans, C. homopropionicum, C. sporogenes, C. tyrobutyricum, environmental sequences	180	Transposase (<)	Varies
NC_008593_1_1_334	RPL-2	Ribosomal protein leader L34	Firmicutes; Clostridia; Clostridiales; Clostridiaceae; Clostridium (botulinum, argentinense, carboxidivorans,...), environmental sequences	149		RpmH - Ribosomal protein L34 (>)
NC_008593.1/2052129-2052387	sRNA-2	G-rich sRNA	Firmicutes; Clostridia; Clostridiales	125	Unknown function (>), other random genes	YsxC - GTP-binding protein (<), YihA family ribosome biogenesis GTP-binding protein (<), YafY - Predicted DNA-binding transcriptional regulator (<), other random genes
NC_008593.1/2146547-2146236	Firmi-groES RNA	RNA thermometer regulating GroES heat shock gene	Firmicutes; Bacilli; Bacillales; Bacillaceae, Firmicutes; Clostridia; Clostridiales, Thermoanaerobacterales	98	DUF1461 (<), COG0398 (>)	GroES|GroEL (>)
NC_008593.1/167927-168291	HRC-3	High ranking candidate, perhaps on opposite strand	Firmicutes; Clostridia; Clostridiales; Clostridiaceae; Clostridium (multiple species), Caloramator; Caloramator, Fervidicella; Fervidicella metallireducens, Oxobacter; Oxobacter pfennigii, Thermobrachium; Thermobrachium celere	77	Glycyl-tRNA synthetase (class II) (>)	UDP-N-acetylmuramoyl-L-alanyl-D-glutamate synthetase (murD) (>), Family 4 Uracil-DNA glycosylase (UDG), found exclusively in thermophilic organisms (upstream of murD) (>)
NC_008593.1/939641-940033	uORF-14	uORF with cysteine rich end.	C. novyi, C. botulinum, C. colicanis, C. haemolyticum, C. homopropionicum, environmental sequences	21	Alkyladenine DNA glycosylase catalyzes the first step in base excision repair (<)	Predicted PurR-regulated permease PerM (>)
NC_008593.1/219079-219377	RPL-3	Ribosomal protein leader candidate	Firmicutes; Clostridia; Clostridiales; Clostridiaceae; Clostridium (botulinum, argentinense, carboxidivorans, colicanis, homopropionicum, kluyveri ,novyi, sulfidigenes), environmental sequences	20	Elongation factor Tu (>)	RpmG - Ribosomal protein L33 (>)
NC_008593.1/436761-437117	MRC-1	Sometimes contains TS, sometimes just conserved section after TS	C. novyi, C. botulinum	20	ABC transporter permease (>)	(rpoE) DNA-directed RNA polymerase specialized sigma subunit, sigma24 family (>), (ccmA) ABC-type multidrug transport system, ATPase component (>)
NC_008593.1/1943257-1943525	MRC-2	?	C. novyi, C. botulinum	19	Staygreen protein homolog (>), sodium:proton antiporter (only one) (<)	prephenate dehydratase (>), rRNA 5S|rRNA 23S (<), end of genome
NC_008593.1/2127227-2127536	uORF-15	Contains terminator stem followed by short open reading frame (overlaps WP_039282006.1 once)	C. novyi, C. botulinum, C. haemolyticum	19	PTS fructose transporter subunit IIC (>), Haloacid dehalogenase-like hydrolases (>)	DUF4491 (>)
NC_008593.1/1028863-1029366	MRC-3	?	Various Clostridium species	18	Recombinase XerD (>), YebC/PmpR family DNA-binding transcriptional regulator (>)	Unknown function (>), MazF/PemK family toxin (>)
NC_008593.1/2440505-2439911	PBC-7	Transcription factor binding site candidate	C. novyi, C. botulinum, C. colicanis, C. homopropionicum	15	Putative translaldolase; Provisional (>)	DUF1836 (member of the Helix-Turn-Helix DNA binding domain of transcription regulators from the MerR superfamily) (>)
NC_008593.1/1394173-1393917	MRC-4	Medium-ranking cis-regulatory candidate	C. botulinum, C. haemolyticum, C. novyi, C. perfringens, C. tetani	14	Varies	Phage antirepressor protein AntA (>)
NC_008593.1/1688975-1688667	Repeat sequence 3	(sometimes) Transposase associated repeat sequence, found 1-3 copies in same region in genome (sometimes seperated by gene)	C. novyi, C. botulinum	13	Varies, more than 100 nt from genes	Varies, more than 100 nt from genes
NC_008593.1/192818-192392	sORF-4	Short open reading frame	C. novyi, C. botulinum, C. colicanis, C. haemolyticum	13	Ferritin-like superfamily of diiron-containing four-helix-bundle protein (>)	Aspartate decarboxylase (<)
NC_008593.1/2301032-2300478	Clost-cspC RNA	Variant of cspA thermoregulator (RF01766) ?	C. novyi, C. botulinum, C. haemolyticum, environmental sequences	11	DUF1540 domain-containing protein (<)	Cold shock protein, CspA family, DNA-binding domain (>)
NC_008593.1/2376454-2376727	MRC-5	Medium ranking cis-regulatory element	C. novyi, C. botulinum, C. colicanis, environmental sequences	10	TatD family deoxyribonuclease (far >)	Unknown function (same one, contains two DUF348 regions) (>)
NC_008593.1/2293136-2292840	PBC-8	Contains possible CcpA binding site, similar regulation of this gene occurs in B. subtilis	C. novyi, C. botulinum, C. haemolyticum	10	NAD(FAD)-dependent dehydrogenase (>)	Glycerol transporter (>)
NC_008593.1/2130472-2131141	PBC-9	Transcription factor binding site candidate	C. novyi, C. botulinum, C. haemolyticum	10	Unknown function (<)	Transcriptional regulator (hipB), contains XRE-family HTH domain (>)
NC_008593.1/97624-97281	RPL-4	Already known ribosomal protein leader for L25 operon, but not in this genome. No overlap with Rfam sequences	C. novyi, C. botulinum	10	Nitrite reductase (<), phosphatase (>)	50S ribosomal protein L25/general stress protein Ctc (>)
NC_008593.1/1199438-1200044	MRC-6	?	C. novyi, C. botulinum, C. pasteurianum	9	ATPase (>), unknown function (>)	DUF1706 (ClbS/DfsB family four-helix bundle protein, DfsB family protein similar to Paenibacillus dendritiformis sibling lethal factor precursor (DfsB), which adopts a non-enzymatic variant of the DinB fold; proteolytic processing of DfsB produces sibling bacteriocin, also called sibling lethal factor (Slf), which inhibits sibling bacterial colonies) (>)
NC_008593.1/700227-700585	sRNA-3	Potential simple structure, contains terminator stem. Although upstream of a number of genes, >300 nucleotides away from downstream gene, so it is probably not cis-acting.	C. novyi, C. botulinum	9	Unknown function (>)	Transglutaminase (>), (lolE) ABC-type transport system, involved in lipoprotein release, permease component (2 examples) (>)
NC_008593.1/929480-929089	TS-1	Terminator stem	C. novyi, C. botulinum, C. haemolyticum	8	Type 2 periplasmic binding fold superfamily (>)	Protein of unknown function (<)
NC_008593.1/1490121-1489819	uORF-16	Short open reading frame	C. novyi, C. botulinum	7	DNA-binding transcriptional regulator (yozG), XRE family (>)	Unknown function (>)
NC_008593.1/2426145-2425073	LRC-1	Short RNA	C. novyi, C. botulinum	5	Unknown function (>)	NorM - Na+-driven multidrug efflux pump (>)
NC_008593.1/274011-274713	Unnamed	?	C. Novyi	3	Unknown function (>)	Pyruvate, phosphate dikinase (>)
NC_008593.1/2427738-2428052	Unnamed	?	C. Novyi	1	Unknown function (>)	Unknown function (<)
NC_008593.1/1387983-1387738	Unnamed	?	C. novyi	1	Unknown function (>)	Unknown function (>)
NC_008593.1/2427738-2428052	Unnamed	?	C. Novyi	1	Unknown function (>)	Unknown function (<)

## Sheet: c | T. lienii
Accession	Motif name	Predicted function	Taxonomy	Unique examples	Prominent upstream genes or metabolic pathway; (direction)	Prominent downstream genes/metabolic pathway; (direction)
NC_016148.1/1679608-1679991	MRC-7	?	Synergistetes; Synergistia, environmental sequences	14	Pseudouridine synthase (>)	NAD(P) binding domain of glutamate dehydrogenase (>)
NC_016148.1/871863-872431	MRC-8	?	Synergistetes; Synergistia, environmental sequences	14	Pseudouridine synthase (>)	NAD(P) binding domain of glutamate dehydrogenase (>)
NC_016148.1/345639-346300	MRC-9	?	Synergistetes; Synergistia, environmental sequences	11	Varies	Serine dehydrogenase proteinase (>)
NC_016148.1/318758-319077	PBC-10	Potential cis-regulatory RNA	Synergistetes; Synergistia, environmental, Actinobacteria; Streptosporangiales	58	Varies	Acetohydroxyacid synthase (>)
NC_016148.1/993970-994394	Repeat sequence-5	Transposase associated repeat sequence, 25 in this genome	Firmicutes; Clostridia, Synergistetes; Synergistia, environmental sequences	69	Integrase (<)	Varies
NC_016148.1/1065394-1065658	Repeat sequence-6	Transposase associated repeat sequence, 16 in this genome	Firmicutes; Clostridia, Synergistetes; Synergistia	29	Integrase (<)	Varies
NC_016148.1/233509-233732	Repeat sequence-6	Transposase associated repeat sequence, 16 in this genome	Firmicutes; Clostridia, Synergistetes; Synergistia	29	Integrase (<)	Varies
NC_016148.1/324621-324889	Repeat sequence-6	Transposase associated repeat sequence, 16 in this genome	Firmicutes; Clostridia, Synergistetes; Synergistia	29	Integrase (<)	Varies
NC_016148.1/484990-485305	Repeat sequence-6	Transposase associated repeat sequence, 16 in this genome	Firmicutes; Clostridia, Synergistetes; Synergistia	29	Integrase (<)	Varies
NC_016148.1/744384-744626	Repeat sequence-6	Transposase associated repeat sequence, 16 in this genome	Firmicutes; Clostridia, Synergistetes; Synergistia	29	Integrase (<)	Varies
NC_016148.1/1586015-1586234	Repeat sequence-7	Transposase associated repeat sequence, 2 in this genome	Synergistetes; Synergistia, environmental	5	Transposase (<)	Varies
NC_016148.1/186979-187358	Repeat sequence-8	Transposase associated repeat sequence, 4 in this genome	Atribacteria; Atribacteria, Synergistetes; Synergistia, environmental	9	Transposase (<)	Varies
NC_016148.1/406103-406488	Repeat sequence-8	Transposase associated repeat sequence, 4 in this genome	Atribacteria; Atribacteria, Synergistetes; Synergistia, environmental	9	Transposase (<)	Varies
NC_016148.1/1906644-1907074	Repeat sequence-9	Transposase associated repeat sequence, 29 in this genome	Firmicutes; Bacilli, Firmicutes; Clostridia, Synergistetes; Synergistia, environmental sequences	76	Transposase/Integrase (</>)	Integrase (>)
NC_016148.1/237894-238186	Repeat sequence-10	Transposase associated repeat sequence, 4 in this genome	Synergistetes; Synergistia, environmental sequences	11	Transposase (<)	FOG: TPR repeat (<)
NC_016148.1/500218-500472	Repeat sequence-11	Transposase associated repeat sequence, 9 in this genome	Firmicutes; Clostridia, Synergistetes; Synergistia, environmental sequences	25	Varies	Integrase (<)
NC_016148.1/613490-613841	SLH riboswitch candidate	riboswitch candidate	Synergistetes;Synergistia, Firmicutes;Negativicutes, Firmicutes;Clostridia, environmental sequences	80	Varies	S-layer homology domain (>)
NC_016148.1/1699829-1700208	Unnamed	?	Spirochaetes; Spirochaetales, Synergistetes; Synergistia, environmental sequences	3	Predicted transcriptional regulator (>)	Outer membrane protein (>)
NC_016148.1/224506-224876	Unnamed	?	Synergistetes; Synergistia, environmental sequences	3	Glycerol dehydrogenases (>)	Peptidase M15 (<)
NC_016148.1/163320-163732	Unnamed	?	Synergistetes; Synergistia, Firmicutes; Clostridia	2	Metal binding protein ZntC (<)	Asp/Glu/Hydantoin racemase (<)
NC_016148.1/1865087-1865484	Unnamed	?	Synergistetes; Synergistia	2	Nitroreductase-like family 2 (>)	Thiamin pyrophosphate-requiring enzymes (>)
NC_016148.1/315630-315967	Unnamed	?	Synergistetes; Synergistia, environmental sequences	2	Glutaminase A (<)	Formyltetrahydrofolate synthetase (>)
NC_016148.1/1338630-1339039	Unnamed	?	Synergistetes; Synergistia;	2	ATP synthase alpha/beta family, nucleotide-binding domain (<)	UDP-glucose 4-epimerase (>)
NC_016148.1/1611722-1612118	Unnamed	?	Synergistetes; Synergistia	2	ribonuclease H (<)	Aldehyde:ferredoxin oxidoreductase (>)
NC_016148.1/1173657-1173928	Unnamed	?	Thermovirga lienii	1	Predicted S-adenosylmethionine-dependent methyltransferase (<)	2-oxoacid:acceptor oxidoreductase (>)
NC_016148.1/1662835-1663234	Unnamed	?	Thermovirga lienii	1	Uncharacterized Fe-S protein (<)	Na+/panthothenate symporter (>)
NC_016148.1/1677247-1677508	Unnamed	?	Thermovirga lienii	1	Short chain fatty acid transporter (<)	Predicted acyl-CoA transferases/carnitine dehydratase (<)
NC_016148.1/1688532-1688912	Unnamed	?	Thermovirga lienii	1	Respiratory-chain NADH dehydrogenase (<)	MobA (<)
NC_016148.1/1708951-1709286	Unnamed	?	Thermovirga lienii	1	Putative selenate reductase (<)	Tryptophan synthase beta chain (>)
NC_016148.1/176825-177286	Unnamed	?	Thermovirga lienii	1	Methyl-accepting chemotaxis protein (<)	Hypothetical protein (>)
NC_016148.1/1855022-1855406	Unnamed	?	Thermovirga lienii	1	Aldehyde ferredoxin oxidoreductase (<)	DNA-directed DNA polymerase (<)
NC_016148.1/1878587-1878904	Unnamed	?	Thermovirga lienii	1	Pyridoxal biosynthesis lyase PdxS (<)	Membrane protein (>)
NC_016148.1/1215836-1216103	Unnamed	?	Thermovirga lienii	1	Long-chain fatty acid transport protein (<)	Homoserine dehydrogenase (>)
NC_016148.1/1902830-1903175	Unnamed	?	Thermovirga lienii	1	Polysaccharide biosynthesis protein CapD (<)	Lipid II flippase MurJ (<)
NC_016148.1/1957094-1957429	Unnamed	?	Thermovirga lienii	1	Nuclease (SNase domain-containing protein) (>)	Hypothetical protein (>)
NC_016148.1/260942-261209	Unnamed	?	Thermovirga lienii	1	4-hydroxy-tetrahydrodipicolinate reductase (<)	DsrE family protein (>)
NC_016148.1/28229-28500	Unnamed	?	Thermovirga lienii	1	Ferredoxin (>)	Tripartite AtP-independent periplasmic transporter subunit DctQ (>)
NC_016148.1/284817-285061	Unnamed	?	Thermovirga lienii	1	Metal-dependent phosphohydrolase (<)	Alanine glycine permease (<)
NC_016148.1/296938-297191	Unnamed	?	Thermovirga lienii	1	Membrane protein (<)	RNA polymerase sigma 54 subunit RpoN/SigL (<)
NC_016148.1/320329-320538	Unnamed	?	Thermovirga lienii	1	Phenylacetate--CoA ligase (>)	Aminoacyl-tRNA deacylase (>)
NC_016148.1/52419-52749	Unnamed	?	Thermovirga lienii	1	Rubredoxin (>)	Membrane protein (>)
NC_016148.1/1239303-1239523	Unnamed	?	Thermovirga lienii	1	Carbamate kinase (<)	Ribosome recycling factor (<)
NC_016148.1/775718-775974	Unnamed	?	Thermovirga lienii	1	C4-dicarboxylate ABC transporter substrate-binding protein (<)	HutP (>)
NC_016148.1/864750-865110	Unnamed	?	Thermovirga lienii	1	Peptidase M48 (<)	Class V aminotransferase (>)
NC_016148.1/1273193-1273877	Unnamed	?	Thermovirga lienii	1	magnesium and cobalt transport protein (<)	D-alanine--D-alanine ligase (>)
NC_016148.1/1324871-1325465	Unnamed	?	Thermovirga lienii	1	Integrase(>)	Sir2-like (<)
NC_016148.1/1354314-1354562	Unnamed	?	Thermovirga lienii	1	Na+/alanine symporter (<)	Fatty acid synthesis protein (<)
NC_016148.1/1482710-1483012	Unnamed	?	Thermovirga lienii	1	L,D-transpeptidase catalytic domain (<)	Oligoendopeptidase F (>)

## Sheet: d | A. sp. L
Accession	Motif name	Predicted function	Taxonomy	Unique examples	Prominent upstream genes or metabolic pathway; (direction)	Prominent downstream genes/metabolic pathway; (direction)
NC_017192.1/411394-412153	ffRNA-1	Free floating RNA motif	Actinobacteria, Bacteroidetes, Firmicutes, Proteobacteria (beta, gamma, delta. Epsilon), environmental sequences	4460	Varies	Varies
NC_017192.1/619521-620256	ffRNA-2	Free floating RNA motif	Epsilonproteobacteria;Arcobacter, environmental, Firmicutes, Alphaproteobacteria, Deltaproteobacteria, Gammaproteobacteria	621	Varies	Varies
NC_017192.1/908385-909887	HRC-4*	?	Epsilonproteobacteria;Arcobacter, environmental sequences	14	Varies	Varies
NC_017192.1/945414-946060	HRC-5	?	Epsilonproteobacteria;Arcobacter, environmental sequences	14	Varies	bSCRAP90 (>)
NC_017192.1/1887704-1888178	unnamed	?	Epsilonproteobacteria;Arcobacter	5	Hypothetical (>)	Hypothetical (<)
NC_017192.1/963140-963414	unnamed	?	Epsilonproteobacteria;Arcobacter, environmental sequences	5	Varies (>)	skipping-rope-jackhmmer (<)
NC_017192.1/1372295-1372682	unnamed	?	Epsilonproteobacteria;Arcobacter, environmental, Alphaproteobacteria; Rhizobiales	4	Varies	Varies
NC_017192.1/1374228-1374403	unnamed	?	Epsilonproteobacteria;Arcobacter	3	Varies (>)	Cellulose biosynthesis protein BcsQ (>)
NC_017192.1/1056329-1056787	unnamed	?	Epsilonproteobacteria;Arcobacter, environmental sequences	2	FcbT1	Ureidoglycolate lyase
NC_017192.1/940712-941288	unnamed	?	Epsilonproteobacteria;Arcobacter, environmental sequences	2	Vaires (>)	Varies (<)
NC_017192.1/963817-964193	unnamed	?	Epsilonproteobacteria;Arcobacter	2	skipping-rope-jackhmmer (<)	Hypothetical (<)
NC_017192.1/1890411-1890900	unnamed	?	Epsilonproteobacteria;Arcobacter	1	Hypothetical (>)	Hypothetical (<)
NC_017192.1/2037038-2037473	unnamed	?	Epsilonproteobacteria;Arcobacter	1	Hypothetical (>)	Hypothetical (<)
NC_017192.1/750824-751024	unnamed	?	Epsilonproteobacteria;Arcobacter	1	Predicted epimerase (<)	Hypothetical (<)
* HRC-4 motif searches incidentally revealed the existance of the of sig70 motif in other species

## Sheet: e | B. cicadellinicola
Accession	Motif name	Predicted function	Taxonomy	Unique examples	Prominent upstream genes or metabolic pathway; (direction)	Prominent downstream genes/metabolic pathway; (direction)
NC_007984.1/141615-142060	corA riboswitch candidate	Strong riboswitch candidate	Gammaproteobacteria	325	FdtA-WxcM-like, C-terminal (<)	corA-magnesium and cobalt transport protein (>)
NC_007984.1/218992-219477	Unnamed	?	Gammaproteobacteria	3	recA encoding a bacterial enzyme with roles in homologous recombination|bacterial DNA recombination protein (<)	PBPb|SBP_bac_3-bacterial periplasmic transport systems|extracellular solute-binding proteins (>)
NC_007984.1/241987-242467	Unnamed	?	Gammaproteobacteria	2	SfsA-DNA-binding protein that stimulates sugar fermentation (>)	dksA-RNA polymerase-binding protein (>)
NC_007984.1/454645-455034	Unnamed	?	Gammaproteobacteria	2	rne-S1-like RNA-binding domain|ribonuclease G (>)	PyrC|PyrC|DHOase|DHOase-dihydroorotase (>)
NC_007984.1/67398-67591	Unnamed	?	Gammaproteobacteria	2	pitA (PHO4|PHO4)-phosphate transporter family (<)	FtsY|SRP-Signal recognition particle GTPase (>)
NC_007984.1/185001-185224	Unnamed	?	Gammaproteobacteria	2	DEXDc|PriA-DEAD-like helicase|primosomal protein N' (replication factor Y) (>)	Protease_Hs1V|ATP_dep_Hs1V (>)
NC_007984.1/654290-655167	Unnamed	?	Gammaproteobacteria	1	HDc|PcnB|NT_ClassII-CCAase- Metal dependent phosphohydrolase|polymerase|nucleotidyltransferase (<)	ribB-DHBP synthase (>)
NC_007984.1/66973-67272	Unnamed	?	Gammaproteobacteria	1	pitA (PHO4|PHO4)-phosphate transporter family (<)	FtsY|SRP-Signal recognition H5particle GTPase (>)
NC_007984.1/239716-239975	Unnamed	?	Gammaproteobacteria	1	SpoT|NT_Rel-Spo_like-(p)ppGpp synthase/hydrolase|nucleotidyltransferase (<)	Pfs-nucleoside phosphorylase (>)
NC_007984.1/581705-581802	Unnamed	?	Gammaproteobacteria	1	dnaK (prok_dnaK) - chaperone protein (>)	DnaJ|DnaJ_bact-DnaJ domain|chaperone protein (>)

## Sheet: f | Summary of all IGRs
Species (Accession)	Alphaproteobacterium HIMB5 (NC_018643.1)	Clostridium novyi (NC_008593.1)	Thermovirga lienii (NC_016148.1)	Arcobacter sp. L (NC_017192.1)	Baumannia cicadellinicola (NC_007984.1)	TOTAL
Number of IGRs:	804	2060	1461	2138	546	1401.8
Average IGR Length (bp):	65.3	166.6	106	97	172.6	121.5
Average IGR %GC:	17.9	25.1	43.7	20.8	23.2	26.14
Number of IGRs selected:	47	76	78	38	16	255
Selected IGR results:
Overlaps protein	13	32	29	23	6	103
Overlaps known RNA	4	2	1	1	0	8
Low ranking candidate	0	1	0	0	0	1
Medium ranking candidate	0	6	3	0	0	9
High ranking candidate	2	1	0	2	0	5
Terminator stem	0	1	0	0	0	1
sORF candidate	3	1	0	0	0	4
uORF candidate	11	5	0	0	0	16
sRNA candidate	1	2	0	0	0	3
Mobile/repeat sequence candidate*	0	9	12	0	0	21
Ribosomal leader candidate	0	4	0	0	0	4
RNA thermometer candidate	1	2	0	0	0	3
Protein binding candidate	5	4	1	0	0	10
Free floating RNA candidate	0	0	0	2	0	2
Ribozyme candidate	0	0	0	0	0	0
Strong riboswitch candidate	2	1	1	0	1	5
Weak riboswitch candidate	2	0	0	0	0	2
Unnamed IGR	3	4	31	10	9	57
Other named candidate	0	1	0	0	0	1
Total IGRs analyzed:	47	76	78	38	16	255
* Includes redundant sequences
